# Supplementary material
Source: PubMed Central journal article supplement (PMC2677611)
Supplement: rspb20090141s03.pdf [file rspb20090141s03.pdf]

Table 1. Summary of specimens, ID = identification number (personal collection of first author), and GenBank accession numbers of the species used.

| Family           | Subfamily     | Species                              | ID     | 12S rRNA  | 16S rRNA  | cox1      | cytb         | RAG1      |
|------------------|---------------|--------------------------------------|--------|-----------|-----------|-----------|--------------|-----------|
| Cyprinidae       | Rasborinae    | <i>Danionella mirifica</i>           | LR1599 | FJ753426* | FJ753455* | N/A       | FJ753512*    | FJ753519* |
| Cyprinidae       | Rasborinae    | <i>Danionella dracula</i>            | LR1600 | FJ753427* | FJ753456* | FJ753484* | EF151099 (a) | FJ753520* |
| Cyprinidae       | Rasborinae    | <i>Boraras maculatus</i>             | LR1639 | FJ753428* | FJ753457* | FJ753485* | EF151096     | FJ753521* |
| Cyprinidae       | Rasborinae    | <i>Chela maasii</i>                  | LR1640 | FJ753429* | FJ753458* | FJ753486* | EF151098     | FJ753522* |
| Cyprinidae       | Rasborinae    | <i>Danio erythromicron</i>           | LR1642 | FJ753430* | FJ753459* | FJ753487* | EF151095     | FJ753523* |
| Cyprinidae       | Rasborinae    | <i>Danionella translucida</i>        | LR1643 | FJ753431* | FJ753460* | FJ753488* | FJ753513*    | FJ753524* |
| Cyprinidae       | Rasborinae    | <i>Devario regina</i>                | LR1644 | FJ753432* | FJ753461* | FJ753489* | EF151100     | FJ753525* |
| Cyprinidae       | Rasborinae    | <i>Inlecycpris auropurpureus</i>     | LR1646 | FJ753433* | FJ753462* | FJ753490* | EF151103     | FJ753526* |
| Cyprinidae       | Rasborinae    | <i>Microrasbora kubotai</i>          | LR1647 | FJ753434* | FJ753463* | FJ753491* | EF151105     | FJ753527* |
| Cyprinidae       | Rasborinae    | <i>Pectenocypris korthusae</i>       | LR1648 | FJ753435* | FJ753464* | FJ753492* | EF151113     | FJ753528* |
| Cyprinidae       | Rasborinae    | <i>Sundadanio axelrodi</i>           | LR1650 | FJ753436* | FJ753465* | FJ753493* | EF151120     | FJ753529* |
| Cyprinidae       | Rasborinae    | <i>Trigonostigma heteromorpha</i>    | LR1652 | FJ753437* | FJ753466* | FJ753494* | EF151122     | FJ753530* |
| Cyprinidae       | Rasborinae    | <i>Esomus metallicus</i>             | LR1653 | FJ753438* | FJ753467* | FJ753495* | EF151101     | FJ753531* |
| Cyprinidae       | Rasborinae    | <i>Nematobramis steindachneri</i>    | LR1654 | FJ753439* | FJ753468* | FJ753496* | EF151106     | FJ753532* |
| Cyprinidae       | Rasborinae    | <i>Luciosoma sp</i>                  | LR1659 | FJ753440* | FJ753469* | FJ753497* | EF151104     | FJ753533* |
| Cyprinidae       | Rasborinae    | <i>Rasbora cephalotaenia</i>         | LR1666 | FJ753441* | FJ753470* | FJ753498* | EF151114     | FJ753534* |
| Cyprinidae       | Rasborinae    | <i>Rasbora daniconius</i>            | LR1668 | FJ753442* | FJ753471* | FJ753499* | EF151115     | FJ753535* |
| Cyprinidae       | Rasborinae    | <i>Rasbora kalochroma</i>            | LR1669 | FJ753443* | FJ753472* | FJ753500* | EF153103     | FJ753536* |
| Cyprinidae       | Rasborinae    | <i>Rasbora pauciperforata</i>        | LR1670 | FJ753444* | FJ753473* | FJ753501* | EF151117     | FJ753537* |
| Cyprinidae       | Rasborinae    | <i>Rasbora kalbarensis</i>           | LR1671 | FJ753445* | FJ753474* | FJ753502* | EF151116     | FJ753538* |
| Cyprinidae       | Rasborinae    | <i>Rasbora vulcanus</i>              | LR1676 | FJ753446* | FJ753475* | FJ753503* | EF151118     | FJ753539* |
| Cyprinidae       | Rasborinae    | <i>Sundadanio axelrodi</i>           | LR1686 | FJ753447* | FJ753476* | FJ753504* | EF151119     | FJ753540* |
| Cyprinidae       | Rasborinae    | <i>Horadandia atukorali</i>          | LR1688 | FJ753448* | FJ753477* | FJ753505* | EF151102     | FJ753541* |
| Cyprinidae       | Rasborinae    | <i>Chela dadiburjori</i>             | LR1689 | FJ753449* | FJ753478* | FJ753506* | EF151097     | FJ753542* |
| Cyprinidae       | Rasborinae    | <i>Danionella</i> sp "South Myanmar" | LR1707 | FJ753450* | FJ753479* | FJ753507* | FJ753514*    | FJ753543* |
| Cyprinidae       | Rasborinae    | <i>Danionella translucida</i>        | LR2100 | FJ753451* | FJ753480* | FJ753508* | FJ753515*    | FJ753544* |
| Cyprinidae       | Rasborinae    | <i>Danionella dracula</i>            | LR2274 | FJ753452* | FJ753481* | FJ753509* | FJ753516*    | FJ753545* |
| Cyprinidae       | Rasborinae    | <i>Danionella dracula</i>            | LR2486 | FJ753453* | FJ753482* | FJ753510* | FJ753517*    | FJ753546* |
| Cyprinidae       | Rasborinae    | <i>Danionella</i> sp "Jorai River"   | LR2613 | FJ753454* | FJ753483* | FJ753511* | FJ753518*    | FJ753547* |
| Cyprinidae       | Rasborinae    | <i>Aphyocypris chinensis</i> (b)     |        | AB218688  | AB218688  | AB218688  | AB218688     | EU292692  |
| Cyprinidae       | Rasborinae    | <i>Opsarichthys uncirostris</i> (b)  |        | AB218897  | AB218897  | AB218897  | AB218897     | EF452847  |
| Cyprinidae       | Rasborinae    | <i>Zacco sieboldii</i> (b)           |        | AB218898  | AB218898  | AB218898  | AB218898     | EU292713  |
| Cyprinidae       | Rasborinae    | <i>Esomus metallicus</i>             |        | AB239594  | AB239594  | AB239594  | AB239594     | EU292702  |
| Cyprinidae       | Rasborinae    | <i>Danio rerio</i>                   |        | AC024175  | AC024175  | AC024175  | AC024175     | NM131389  |
| Cyprinidae       | Acheilognathi | <i>Acheilognathus typus</i>          |        | AB239602  | AB239602  | AB239602  | AB239602     | EU292688  |
| Cyprinidae       | Cultrinae     | <i>Ischikauia steenackeri</i>        |        | AB239601  | AB239601  | AB239601  | AB239601     | EU292687  |
| Cyprinidae       | Cyprininae    | <i>Carassius auratus</i>             |        | AB006953  | AB006953  | AB006953  | AB006953     | EF186007  |
| Cyprinidae       | Cyprininae    | <i>Cyprinus carpio</i>               |        | AP009047  | AP009047  | AP009047  | AP009047     | AY787040  |
| Cyprinidae       | Gobioninae    | <i>Gobio gobio</i>                   |        | AB239596  | AB239596  | AB239596  | AB239596     | EU292689  |
| Cyprinidae       | Leuciscinae   | <i>Phoxinus erythrogaster</i>        |        | AF038490  | AF038490  | EF452857  | AY281055     | EF452834  |
| Cyprinidae       | Leuciscinae   | <i>Notropis atherinoides</i>         |        | AF023195  | AF038486  | EF452855  | AY281062     | EF452832  |
| Cyprinidae       | Leuciscinae   | <i>Cyprinella lutrensis</i>          |        | AB070206  | AB070206  | AB070206  | AB070206     | EU082597  |
| Cyprinidae       | Leuciscinae   | <i>Notemigonus crysoleucas</i>       |        | AB127393  | AB127393  | AB127393  | AB127393     | EF452831  |
| Cyprinidae       | Leuciscinae   | <i>Alburnus alburnus</i>             |        | AB239593  | AB239593  | AB239593  | AB239593     | EU292690  |
| Cobitidae        |               | <i>Cobitis striata</i>               |        | AB054125  | AB054125  | AB054125  | AB054125     | EF458303  |
| Balitoridae      |               | <i>Lefua echigonia</i>               |        | AB054126  | AB054126  | AB054126  | AB054126     | EF458305  |
| Catostomidae     |               | <i>Catostomus commersonii</i>        |        | AB127394  | AB127394  | AB127394  | AB127394     | EF056351  |
| Gyrinocheilidae  |               | <i>Gyrinocheilus aymanieri</i>       |        | AB242164  | AB242164  | AB242164  | AB242164     | EU292682  |
| Cobitidae        |               | <i>Pangio anguillaris</i>            |        | AB242168  | AB242168  | AB242168  | AB242168     | EF056366  |
| Balitoridae      |               | <i>Vaillantella maassi</i>           |        | AB242173  | AB242173  | AB242173  | AB242173     | EF056347  |
| Outgroup:        |               |                                      |        |           |           |           |              |           |
| Gonorynchiformes |               | <i>Chanos chanos</i>                 |        | AB054133  | AB054133  | AB054133  | AB054133     | AY430207  |

\* this study

(a) as *Danionella* sp. Myanmar in Rüber *et al.* 2007

(b) not in Rasborinae clade A as defined by Rüber *et al.* 2007
