# Supplementary material
Source: PubMed Central journal article supplement (PMC2677611)
Supplement: rspb20090141s04.pdf [file rspb20090141s04.pdf]

**Table 1.** Selected morphometric information on 10 males and 10 females of *Danionella dracula* including the holotype.

|                                 | Holotype | Paratypes |      |         |           |      |         |
|---------------------------------|----------|-----------|------|---------|-----------|------|---------|
|                                 | Male     | Males     |      |         | Females   |      |         |
|                                 |          | Range     | Mean | St. Dev | Range     | Mean | St. Dev |
| Standard length (SL)            | 16.3     | 13.3-15.4 |      |         | 11.3-14.2 |      |         |
| In % of SL                      |          |           |      |         |           |      |         |
| Head length                     | 20.2     | 17.6-19.0 | 18.3 | 0.4     | 17.9-19.7 | 18.5 | 0.6     |
| Predorsal-fin length            | 69.3     | 68.1-71.8 | 70.2 | 1.3     | 66.4-71.3 | 69.5 | 1.7     |
| Prepelvic-fin length            | 34.4     | 33.8-35.3 | 34.6 | 0.4     | 33.6-37.2 | 36.0 | 1.1     |
| Preanal-fin length              | 55.2     | 56.3-58.6 | 57.0 | 0.8     | 55.6-58.3 | 57.1 | 0.9     |
| Snout to anus                   | 35.6     | 35.1-39.1 | 36.1 | 1.3     | 55.2-55.4 | 53.7 | 0.9     |
| Body depth at dorsal-fin origin | 16       | 13.5-15.5 | 14.5 | 0.6     | 14.3-16.9 | 15.3 | 0.9     |
| Caudal-peduncle depth           | 9.2      | 7.4-8.8   | 8.5  | 0.7     | 7.1-9.1   | 8.2  | 0.6     |
| Caudal-peduncle length          | 24.5     | 23.6-25.7 | 25.0 | 0.7     | 23.7-26.8 | 25.2 | 1.0     |
| Length of dorsal-fin base       | 8        | 5.6-7.3   | 6.6  | 0.6     | 6.2-6.7   | 6.3  | 0.2     |
| Length of anal-fin base         | 18.4     | 16.9-18.3 | 17.6 | 0.5     | 14.8-18.3 | 16.9 | 1.2     |
| Length of pelvic fin            | 12.3     | 10.9-12.0 | 11.5 | 0.3     | 7.1-8.5   | 7.7  | 0.5     |
| In % of HL                      |          |           |      |         |           |      |         |
| Eye diameter                    | 36.4     | 34.6-38.5 | 36.4 | 1.5     | 35.7-39.1 | 37.7 | 1.2     |
| Snout length                    | 21.2     | 16.0-19.2 | 17.3 | 1.6     | 13.0-19.2 | 16.1 | 2.2     |
| Tip of lower jaw to orbit       | 33.3     | 20.0-26.9 | 23.3 | 2.0     | 17.4-23.1 | 20.1 | 1.9     |
